# Supplementary material
Source: ML conference proceedings conference paper supplement (https://aclanthology.org/2026.semeval-1.210)

Length Distribution (Characters)

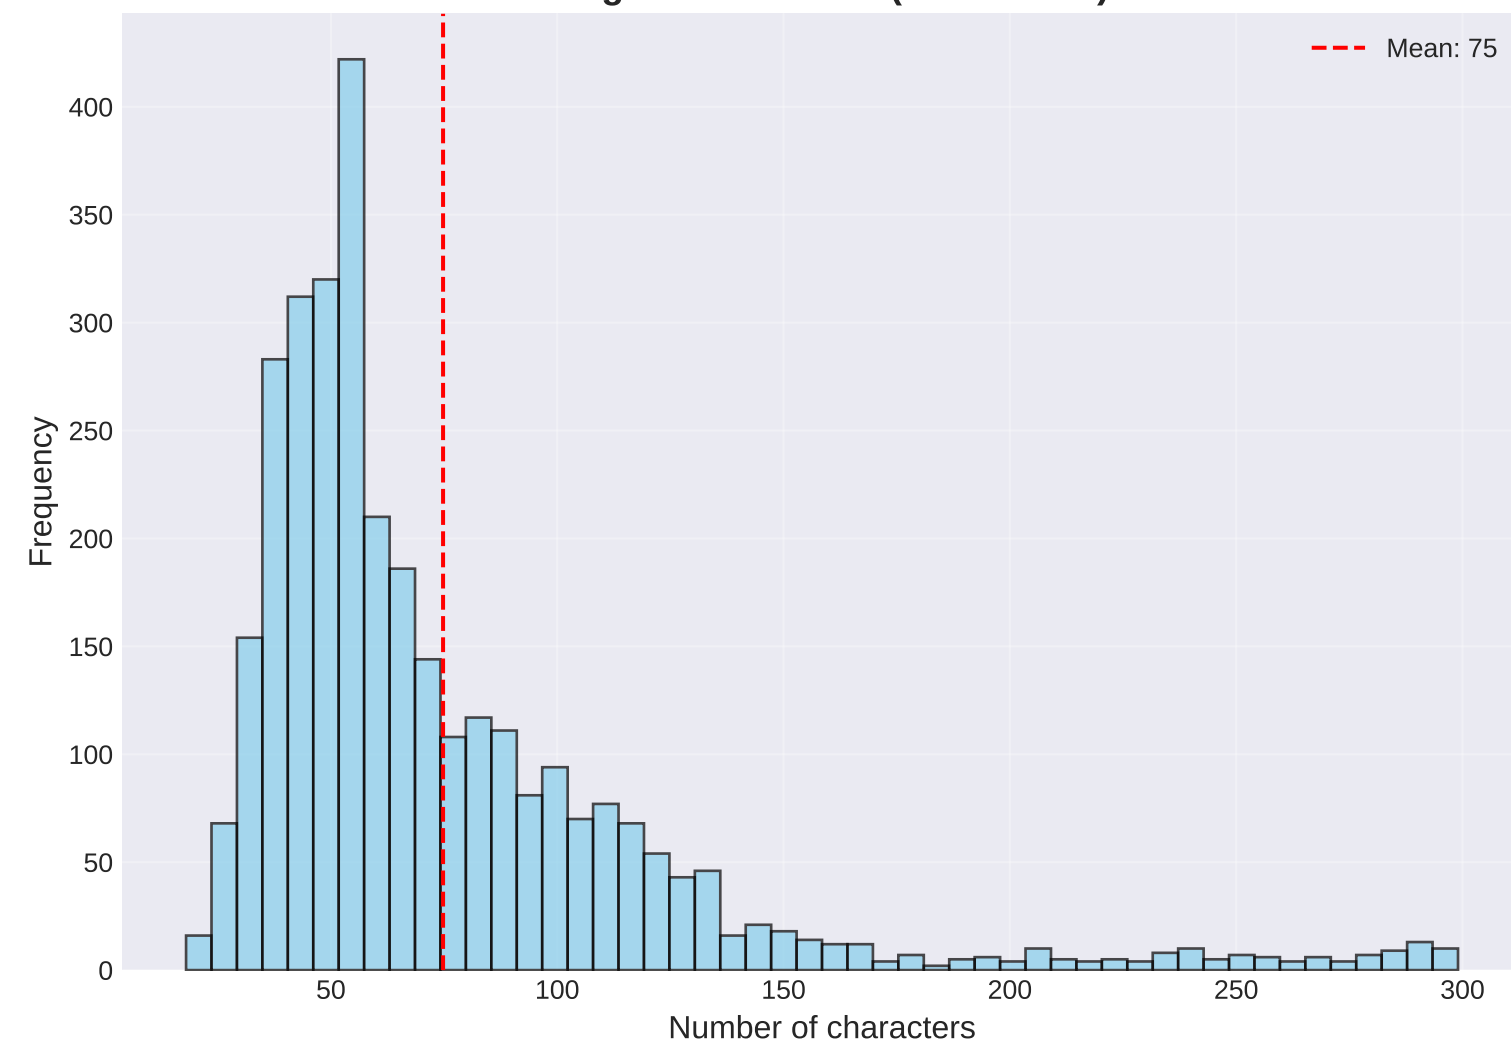

Length Distribution (Words)

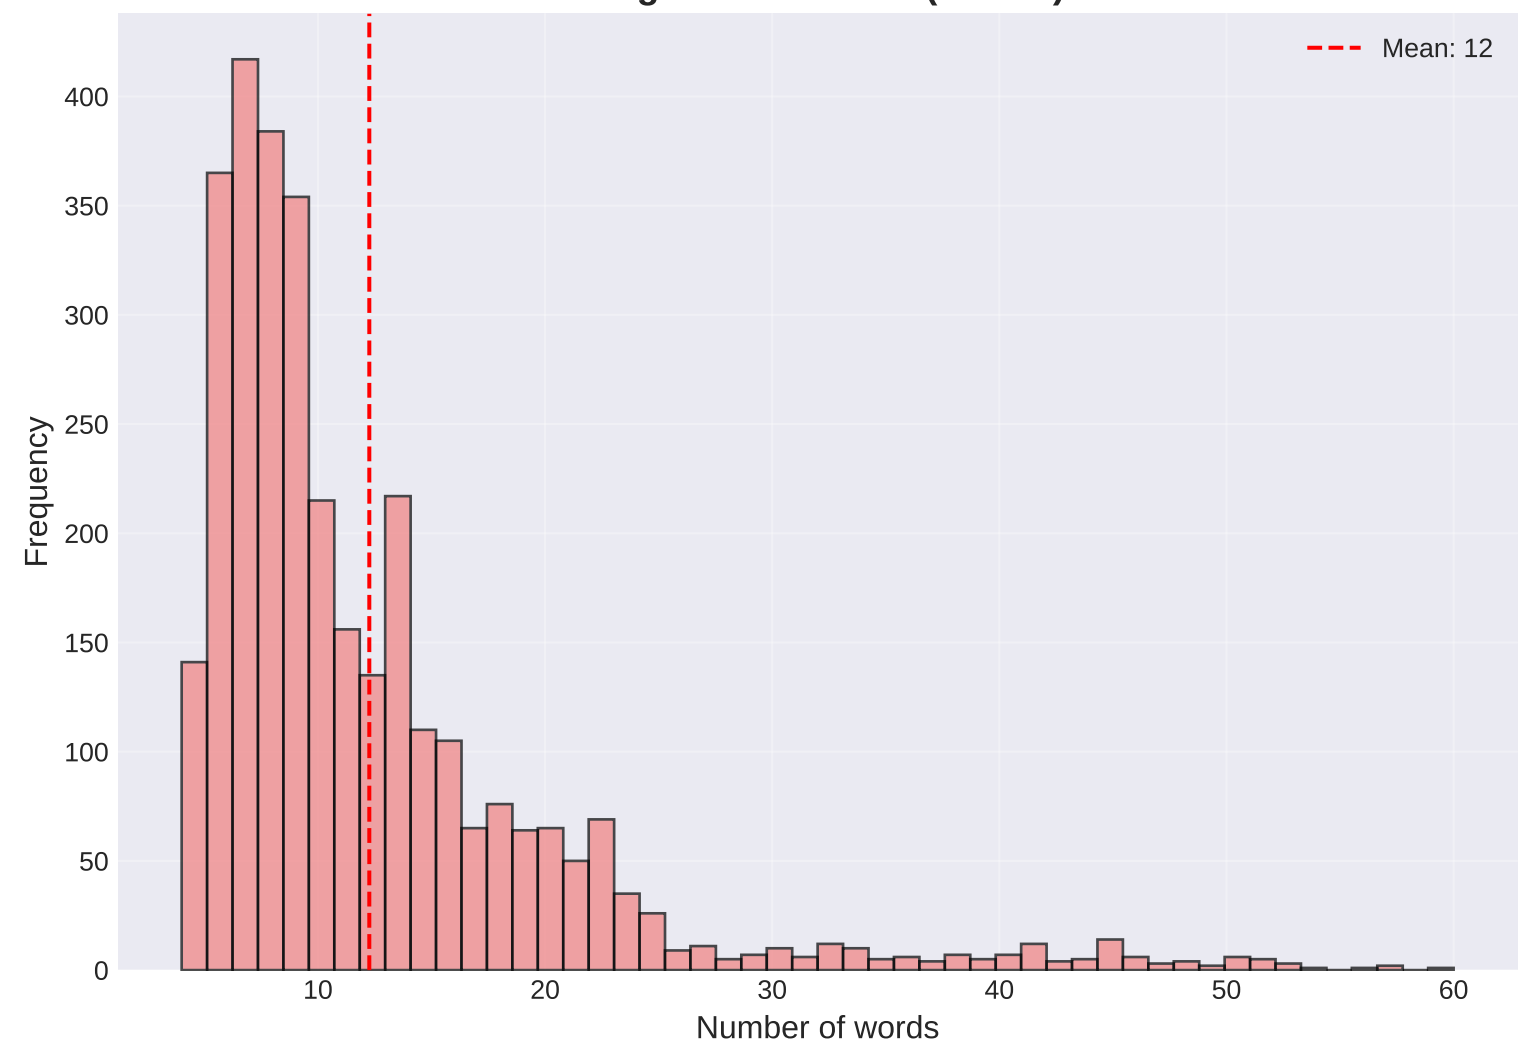

Text Length by Polarization Type

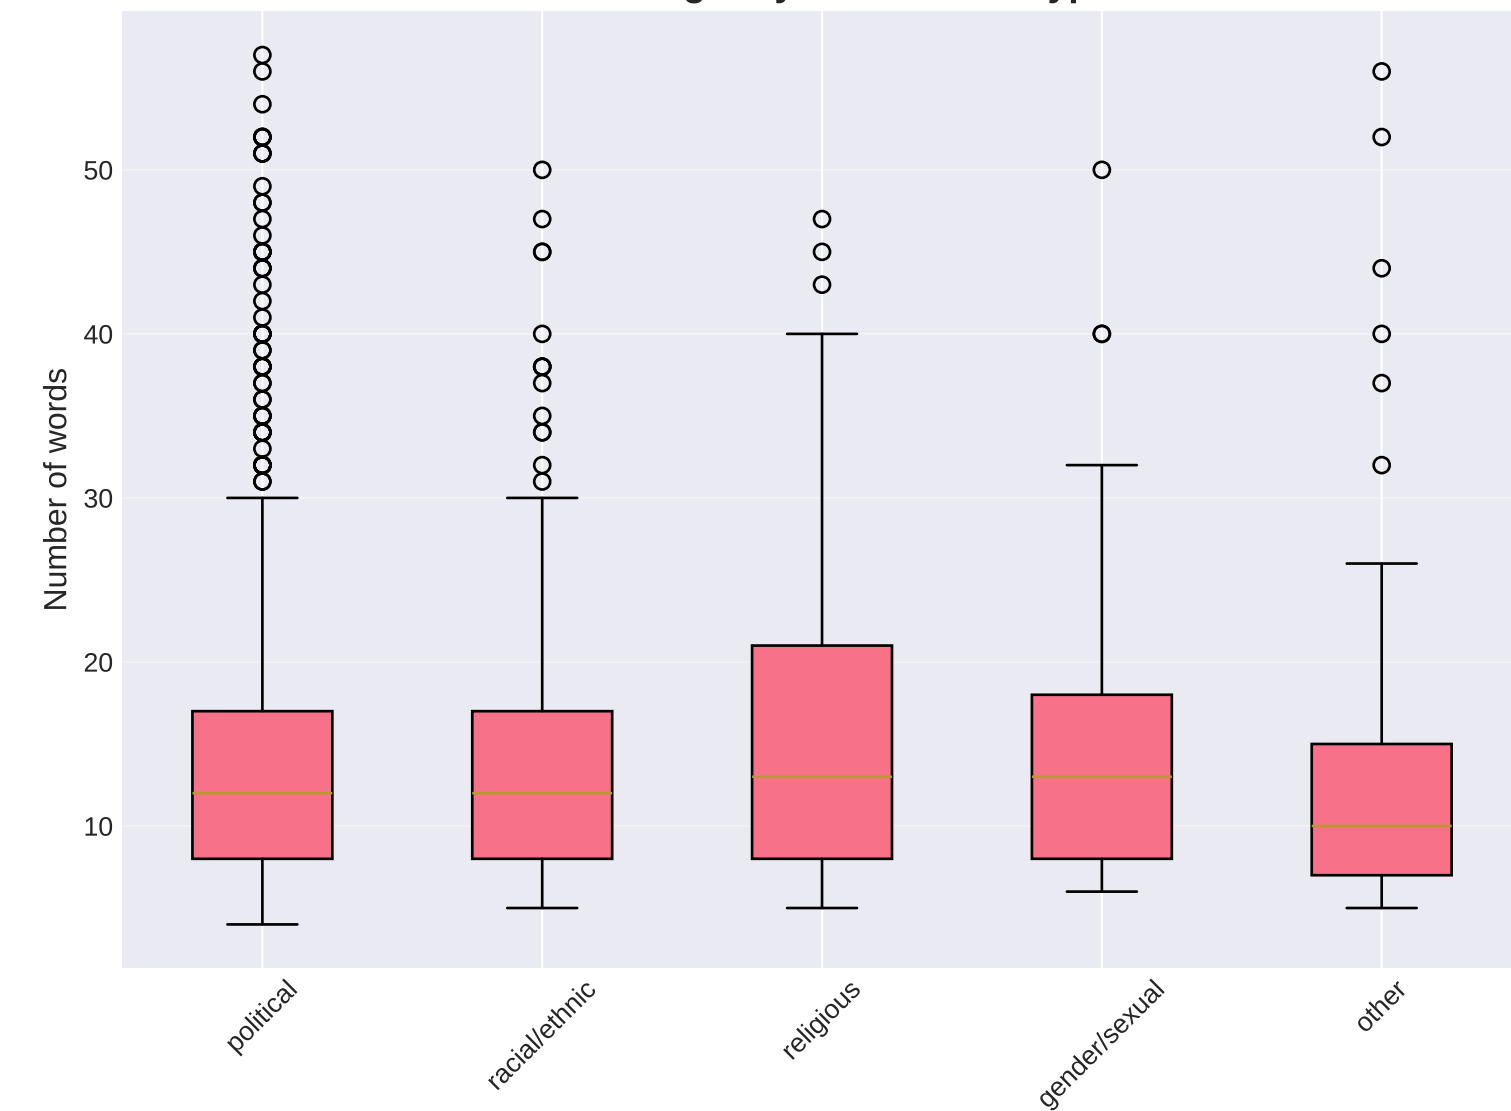

Average Length by Number of Labels

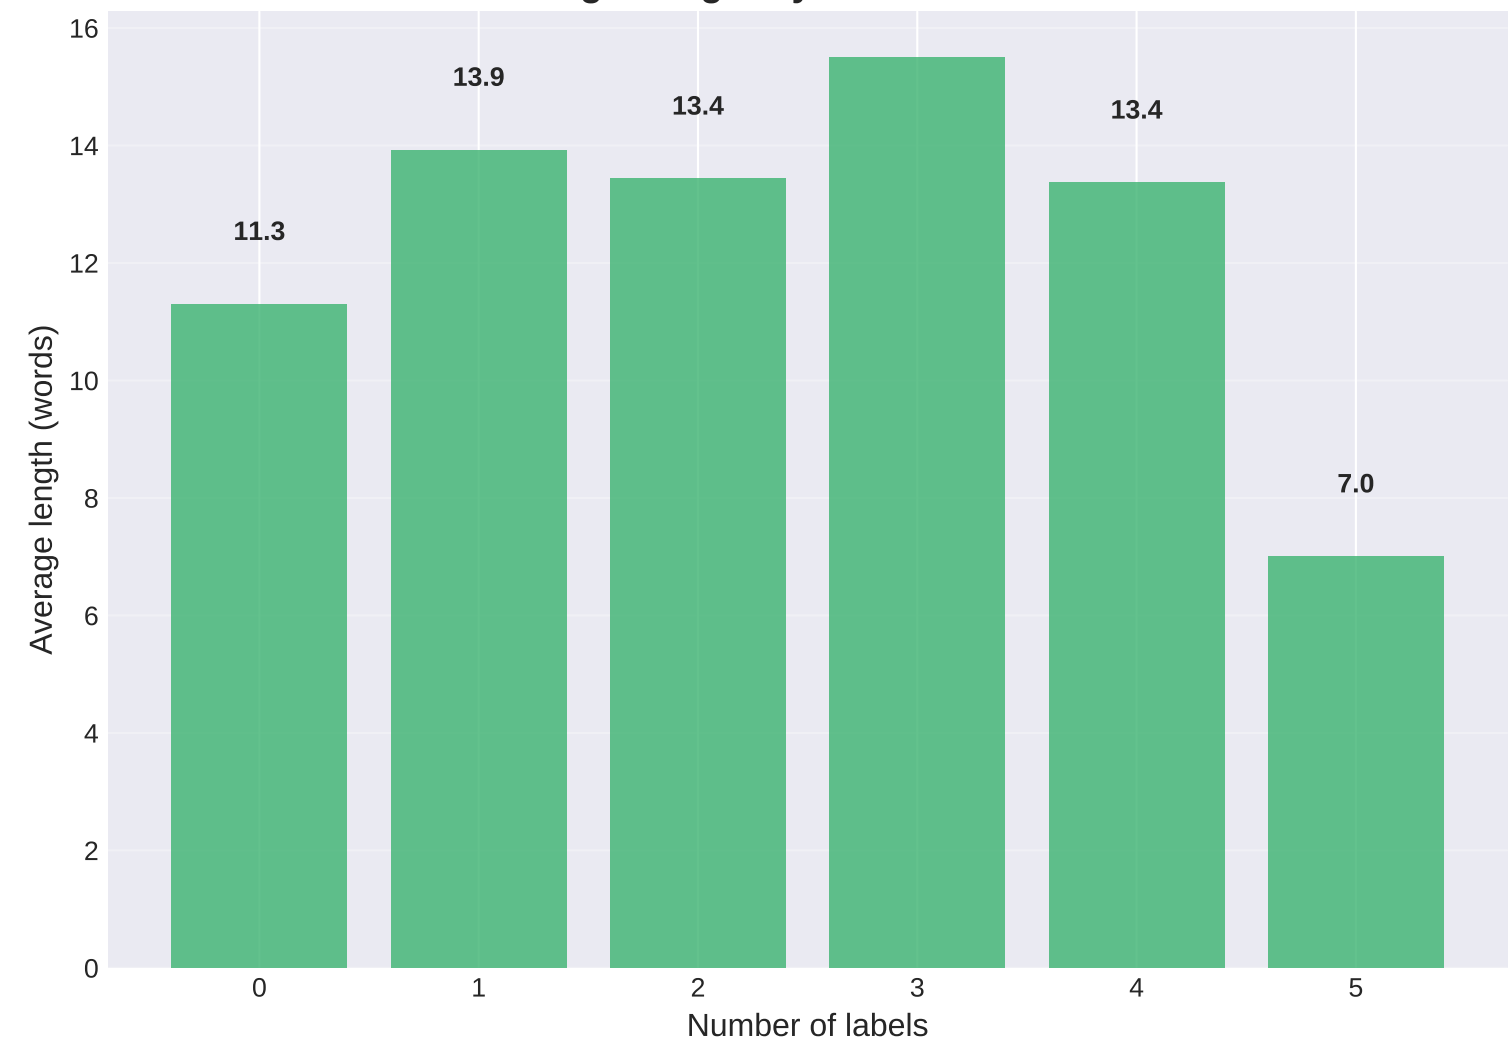

Supplement: SupplementaryMaterial [file Distribution_text_length_subtask_2.pdf › Distribution_text_length_subtask_2.pdf]
