# Supplementary material
Source: ML conference proceedings conference paper supplement (https://aclanthology.org/2026.semeval-1.210)

**Political**

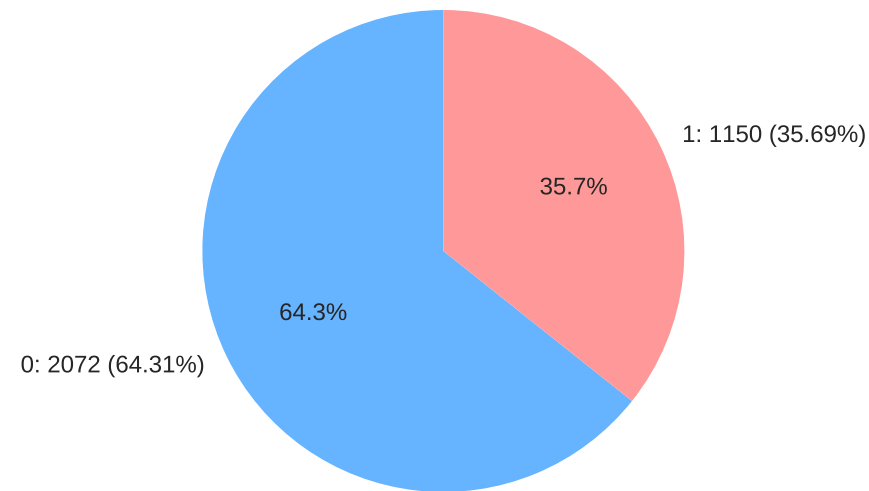

**Racial / Ethnic**

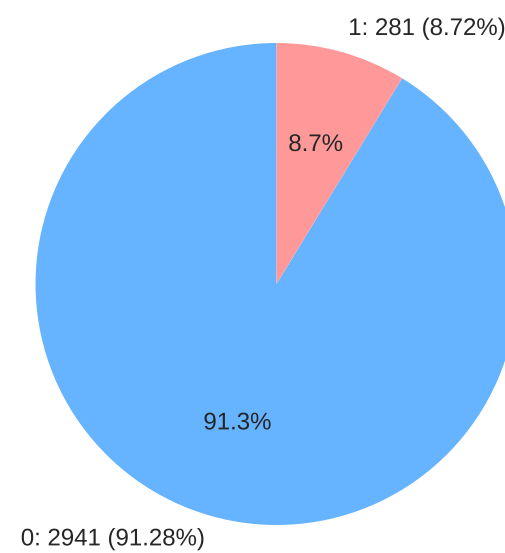

**Religious**

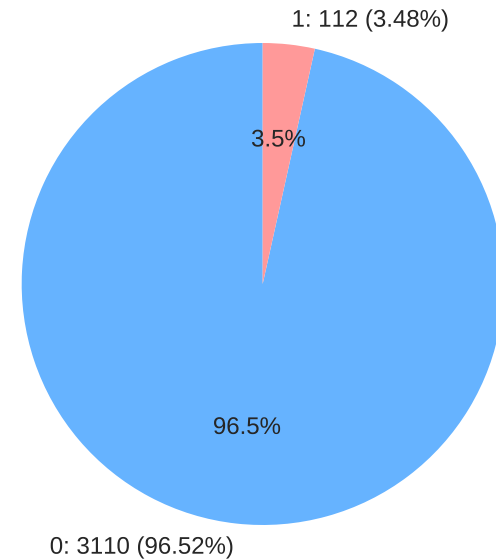

**Gender / Sexual**

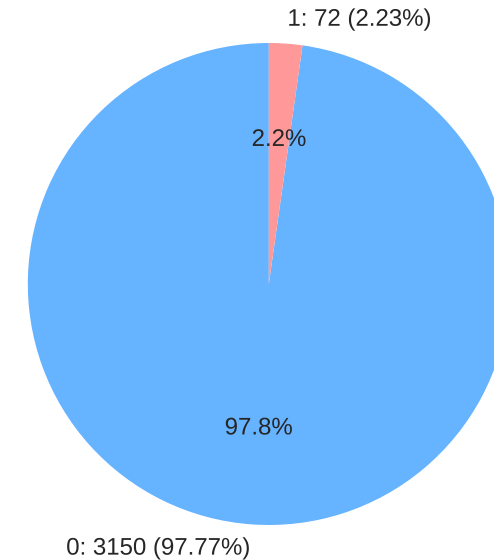

**Other**

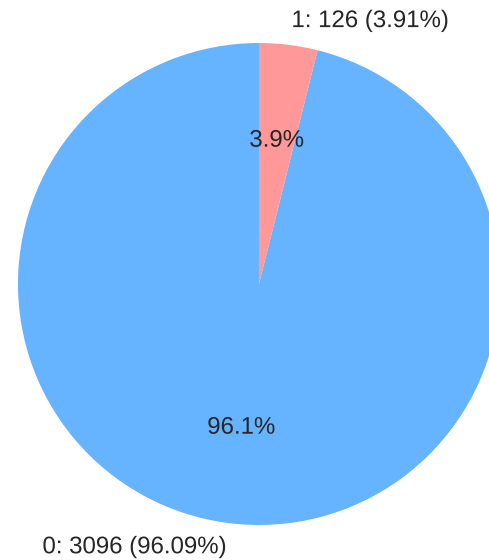

Supplement: SupplementaryMaterial [file Distribution_target_subtask_2-1.pdf › Distribution_target_subtask_2-1.pdf]

Political

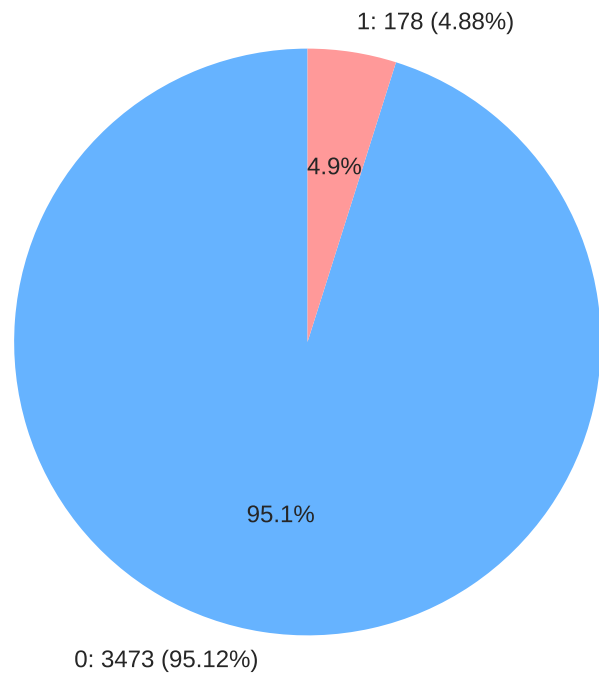

Racial / Ethnic

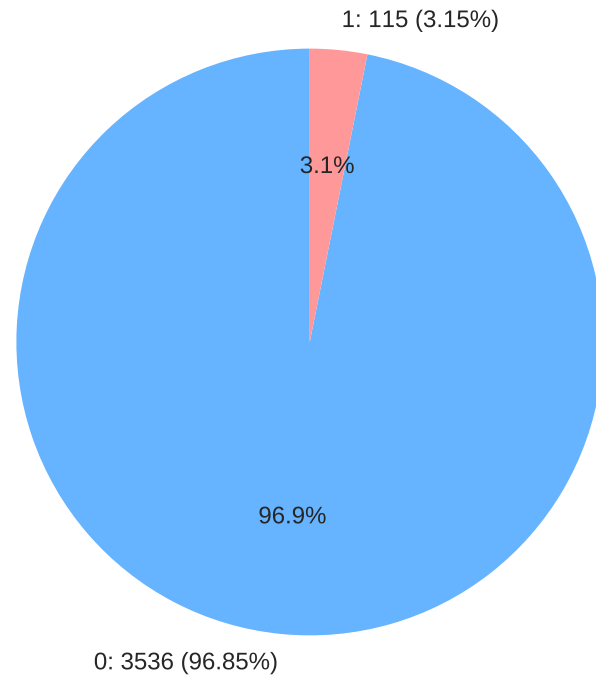

Religious

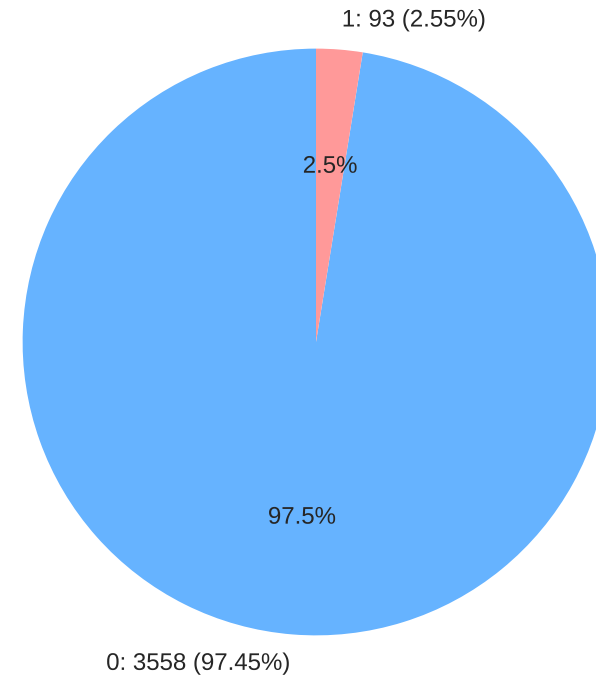

Gender / Sexual

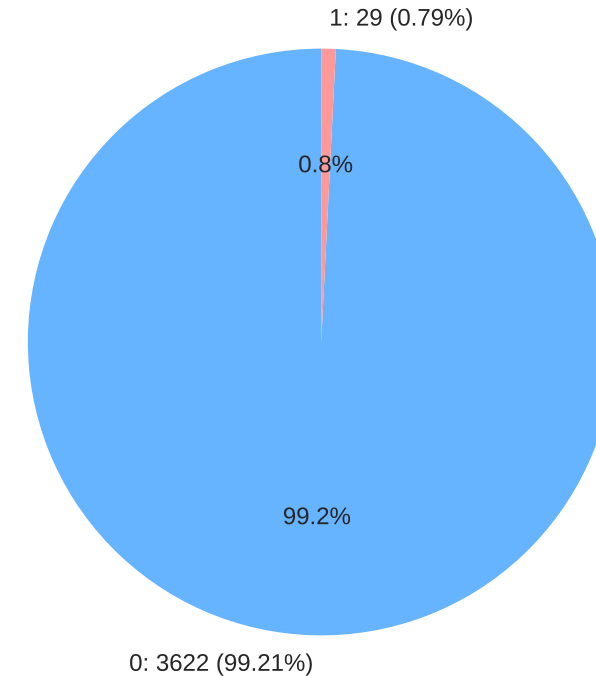

Other

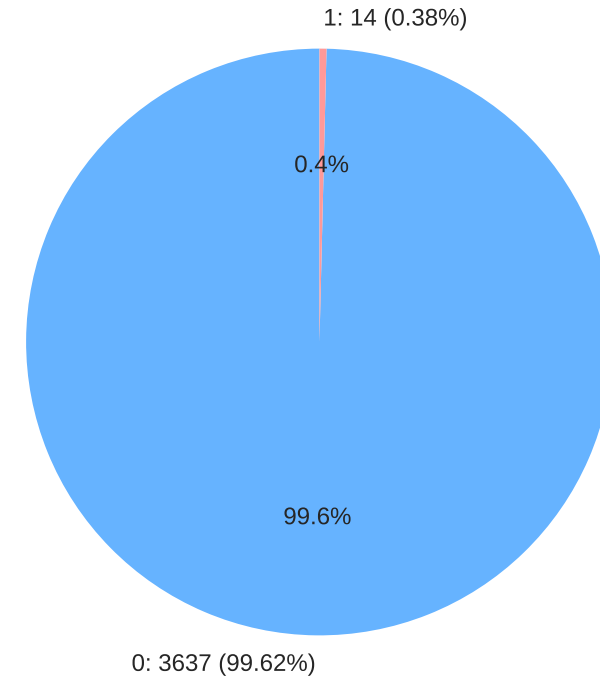

Supplement: SupplementaryMaterial [file Distribution_target_subtask_2_haussa.pdf › Distribution_target_subtask_2_haussa.pdf]

Distribution of Target Labels (Subtask 3)

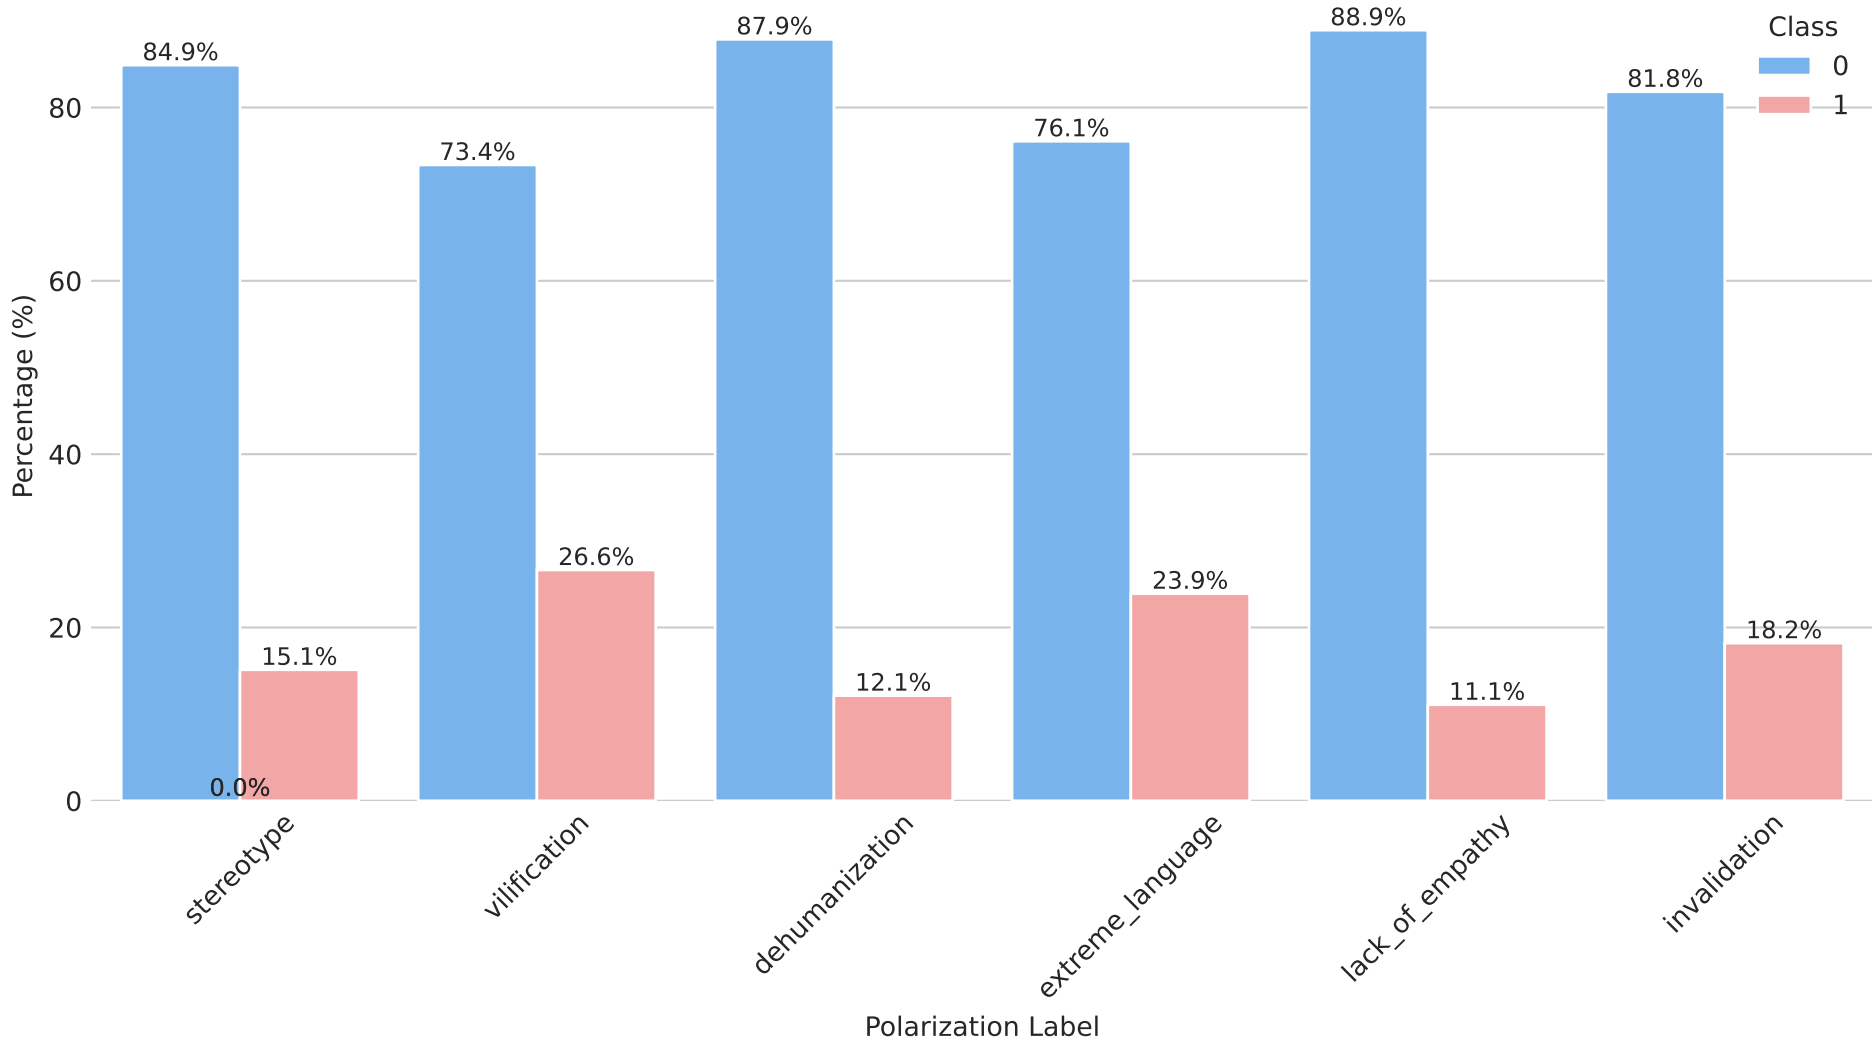

Supplement: SupplementaryMaterial [file Distribution_target_subtask_3_english_barplot.pdf › Distribution_target_subtask_3_english_barplot.pdf]

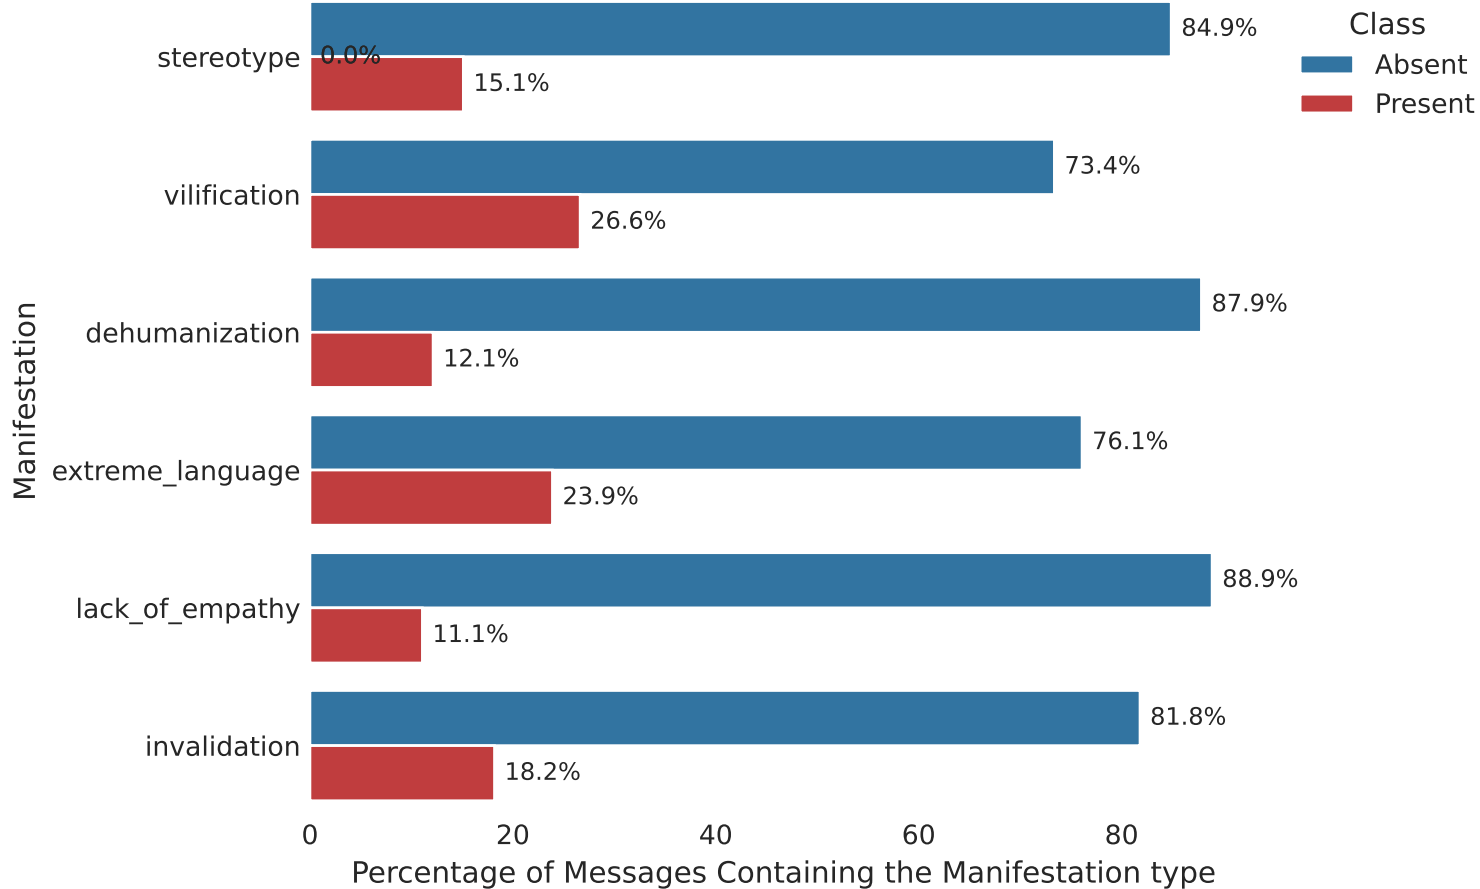

Supplement: SupplementaryMaterial [file Distribution_target_subtask_3_english_barplot_horizontal_acl.pdf › Distribution_target_subtask_3_english_barplot_horizontal_acl.pdf]

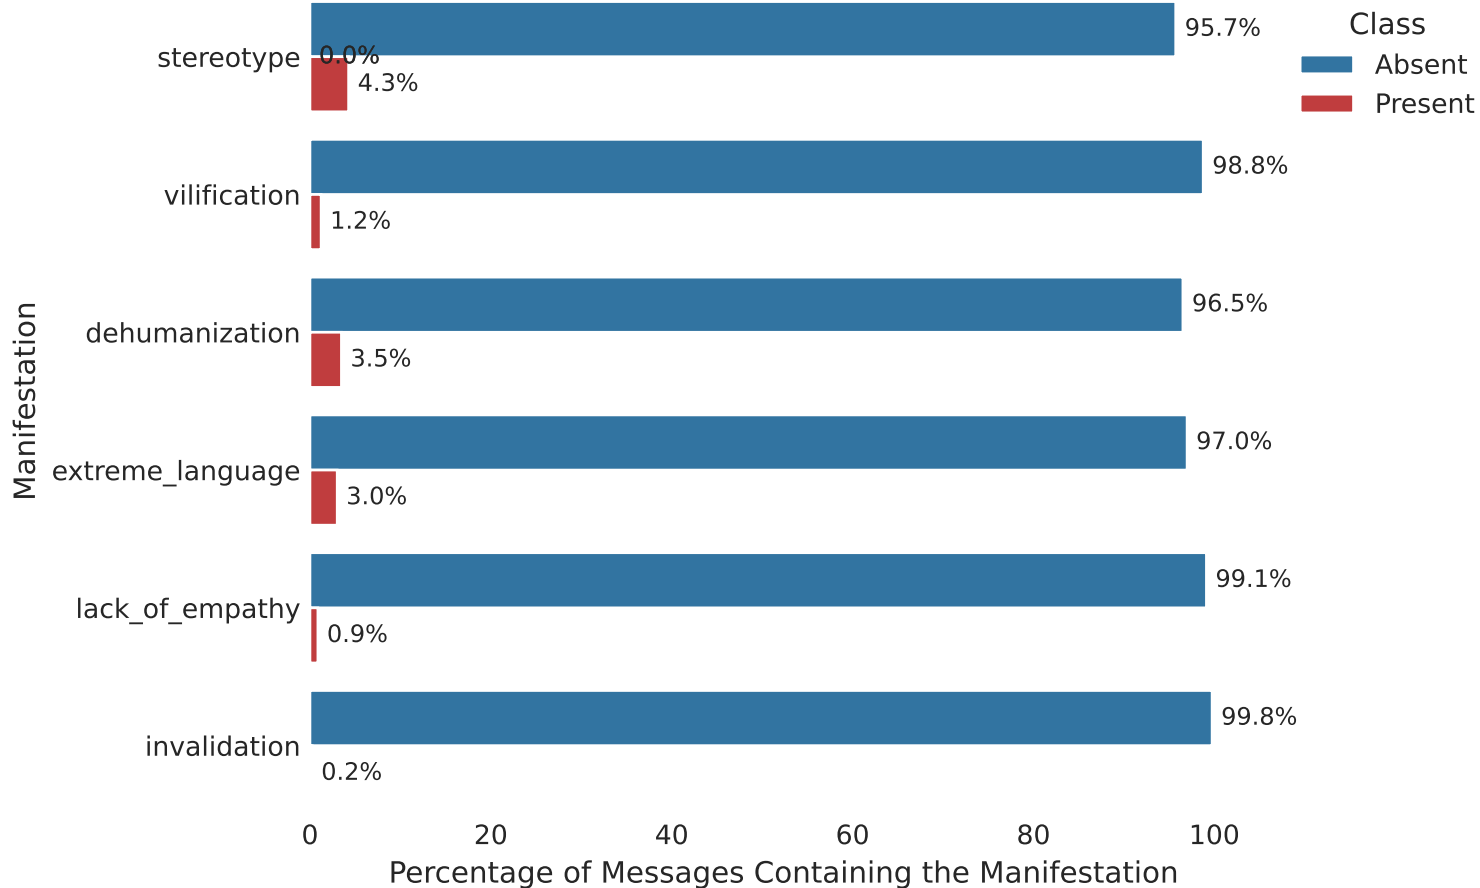

Supplement: SupplementaryMaterial [file Distribution_target_subtask_3_hausa_barplot_horizontal_acl.pdf › Distribution_target_subtask_3_hausa_barplot_horizontal_acl.pdf]

Distribution of Target Labels (Subtask 3) haussa

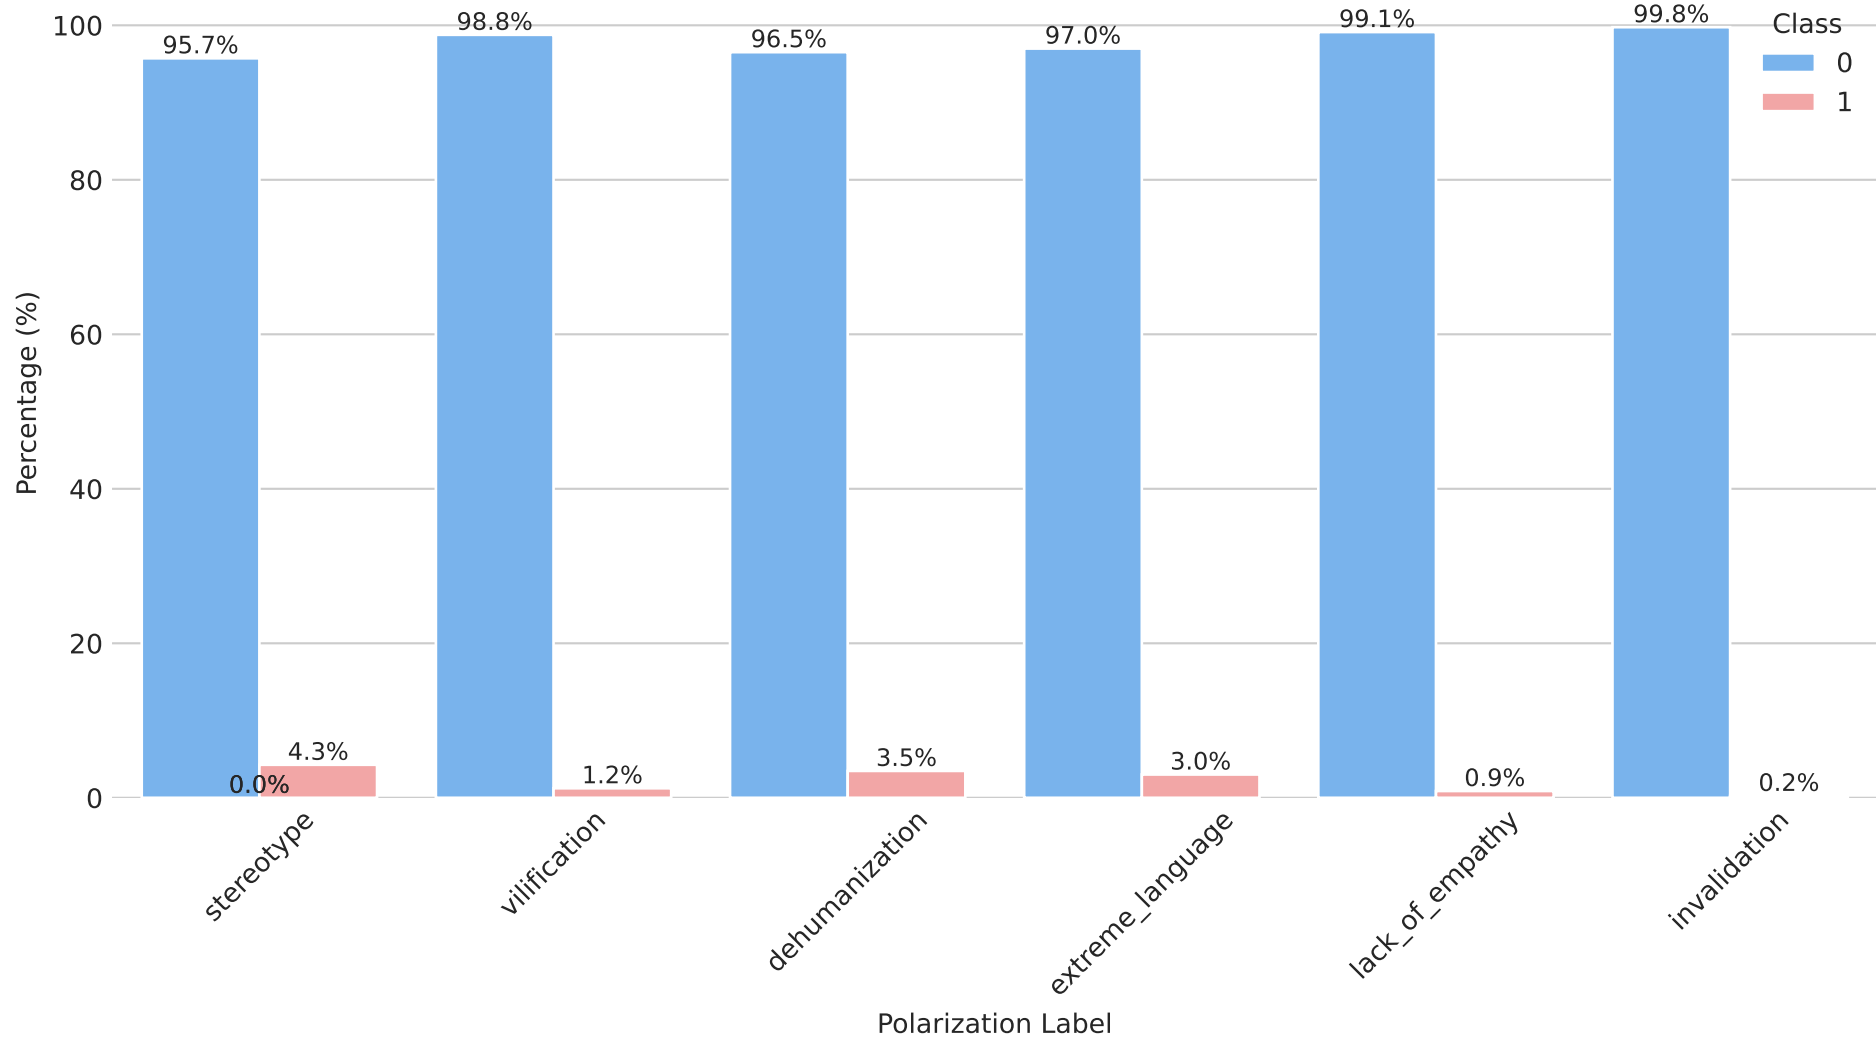

Supplement: SupplementaryMaterial [file Distribution_target_subtask_3_haussa_barplot.pdf › Distribution_target_subtask_3_haussa_barplot.pdf]

### Distribution of Number of Labels

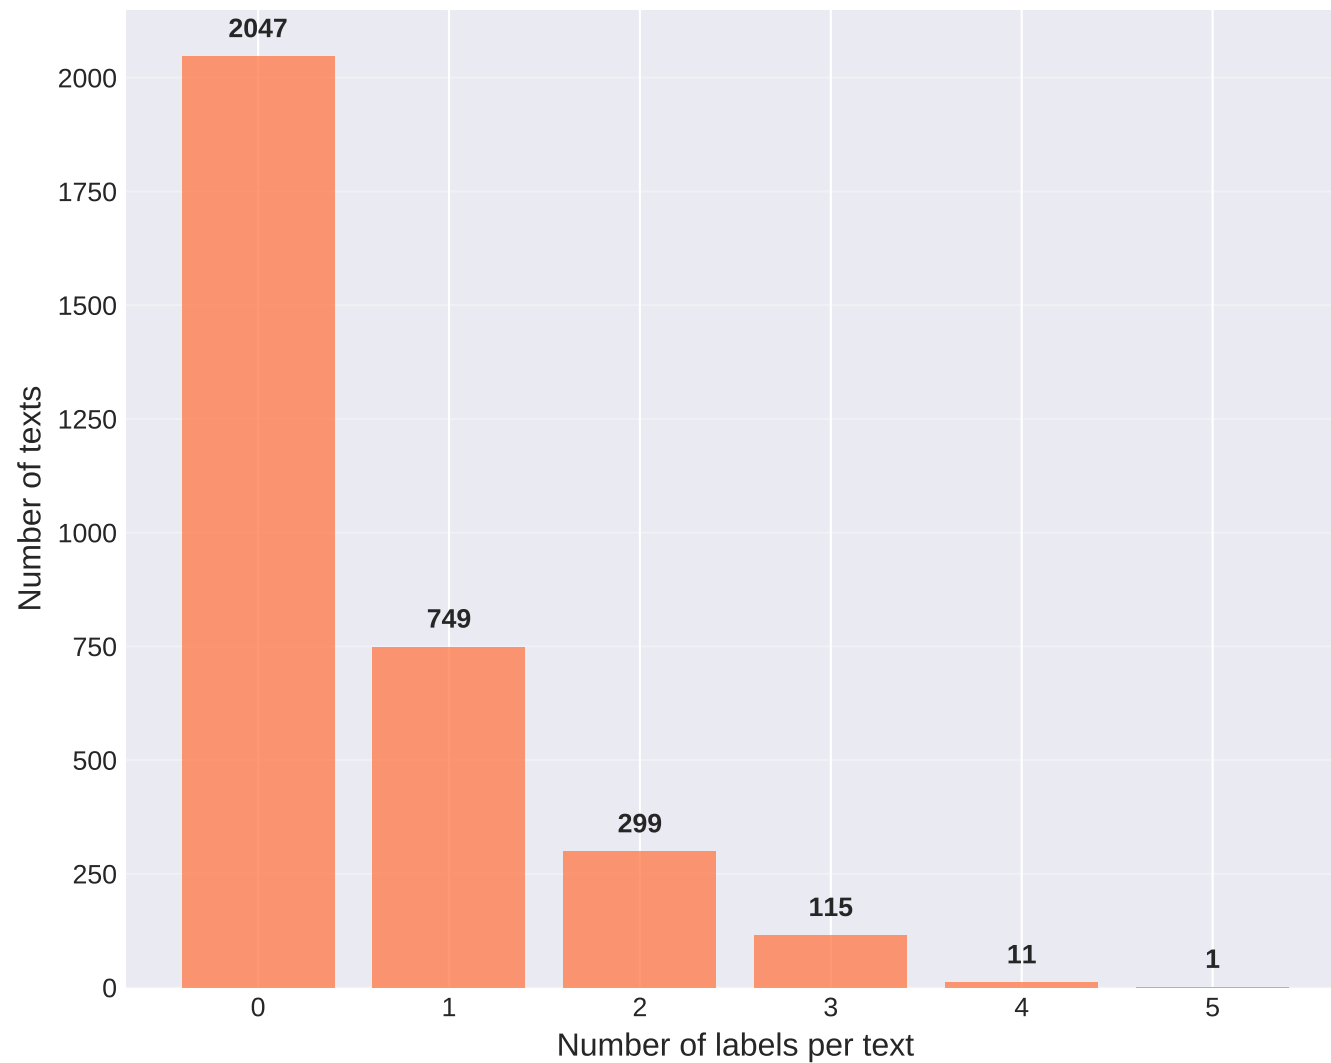

### Top 10 Label Combinations

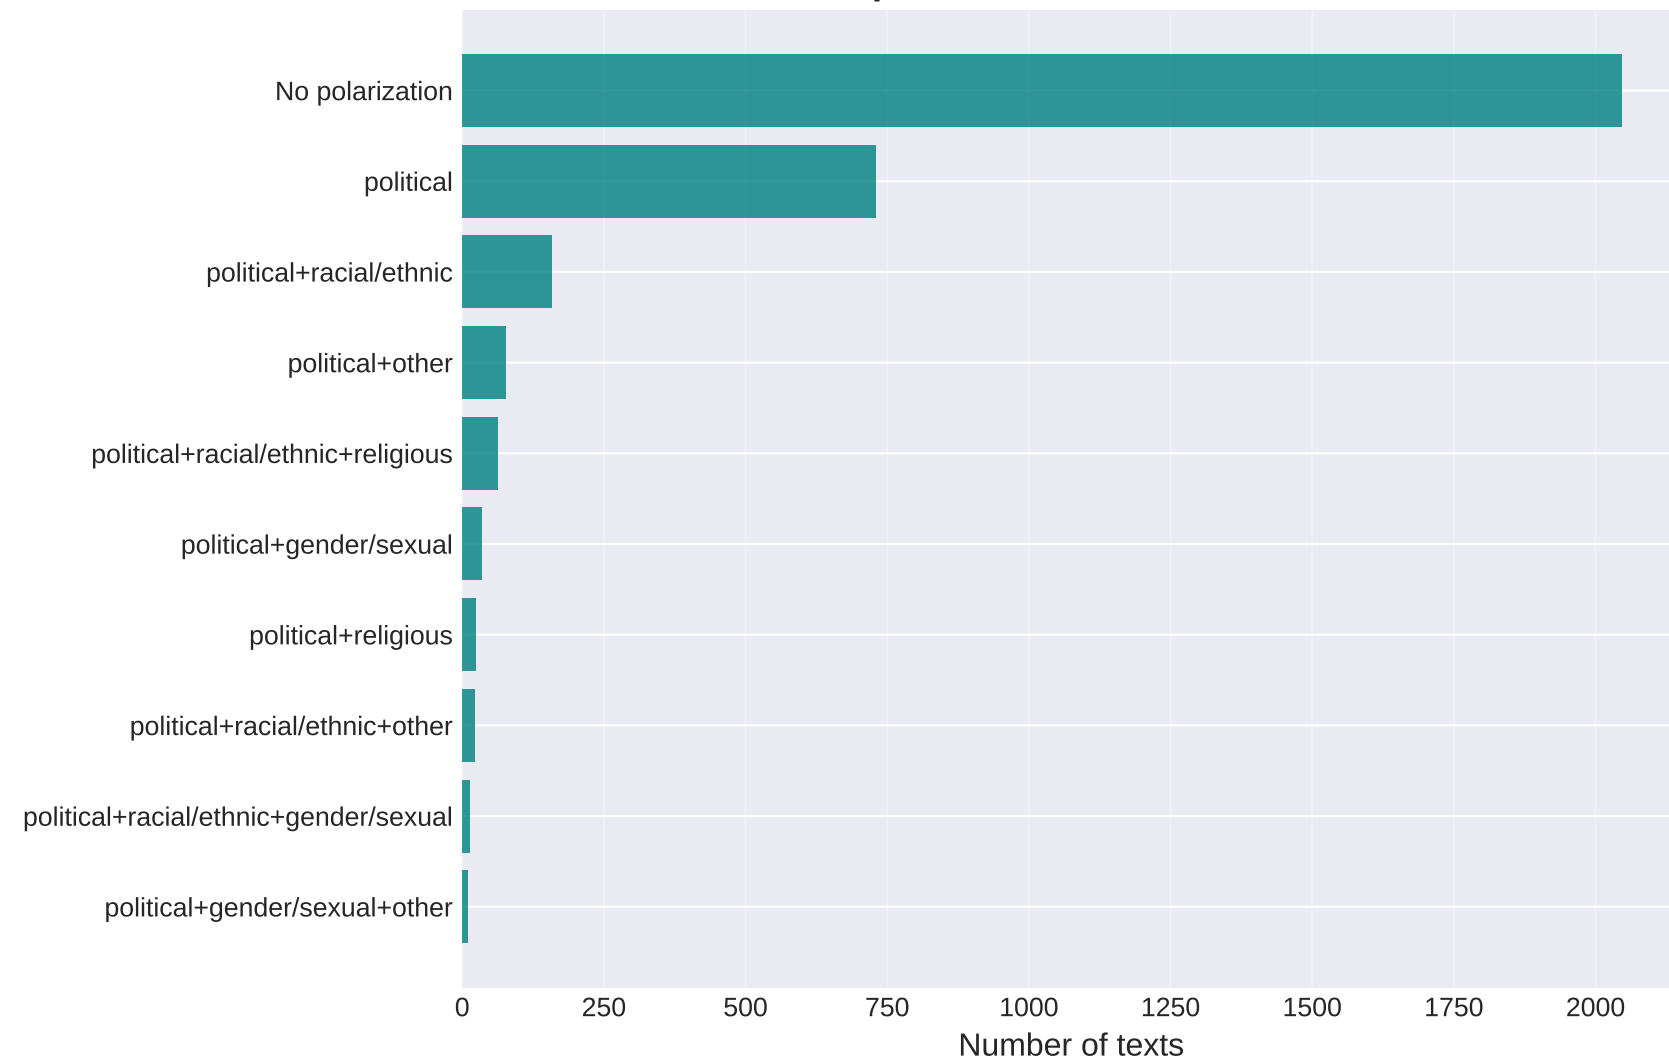

Supplement: SupplementaryMaterial [file Distribution_text_combinaisons_subtask_2.pdf › Distribution_text_combinaisons_subtask_2.pdf]

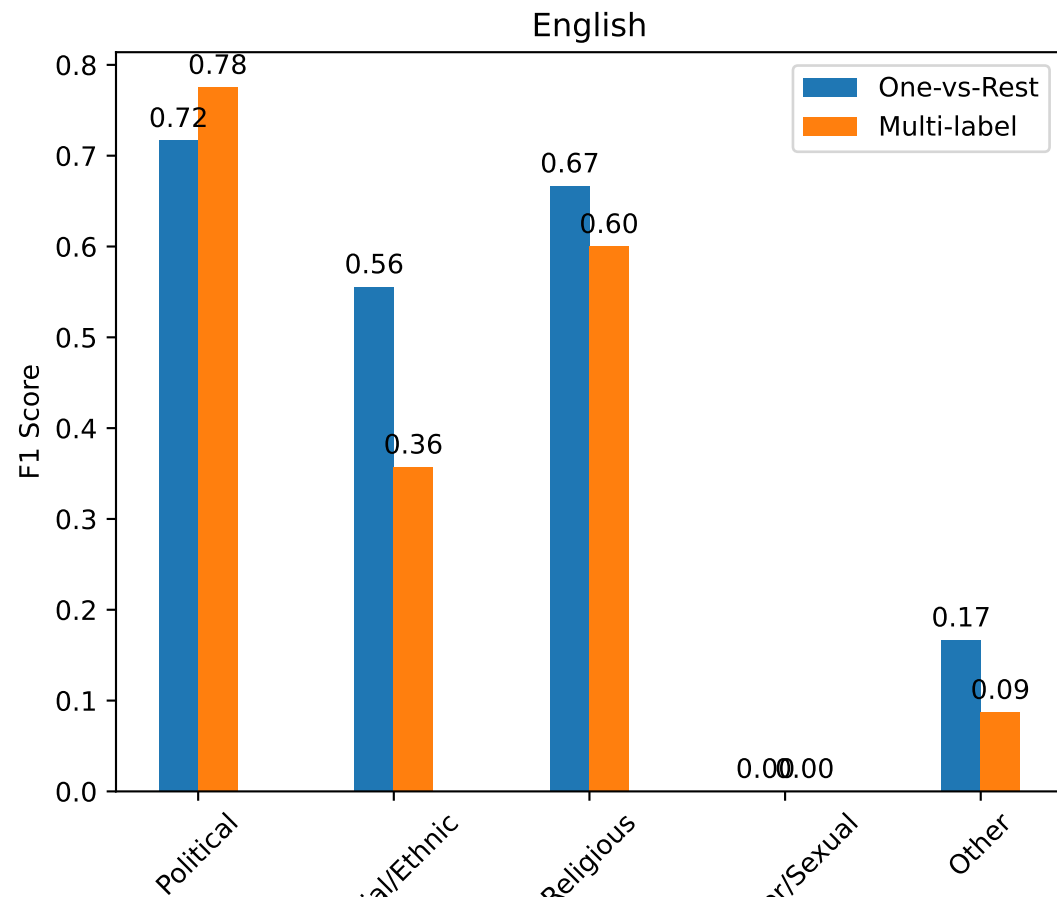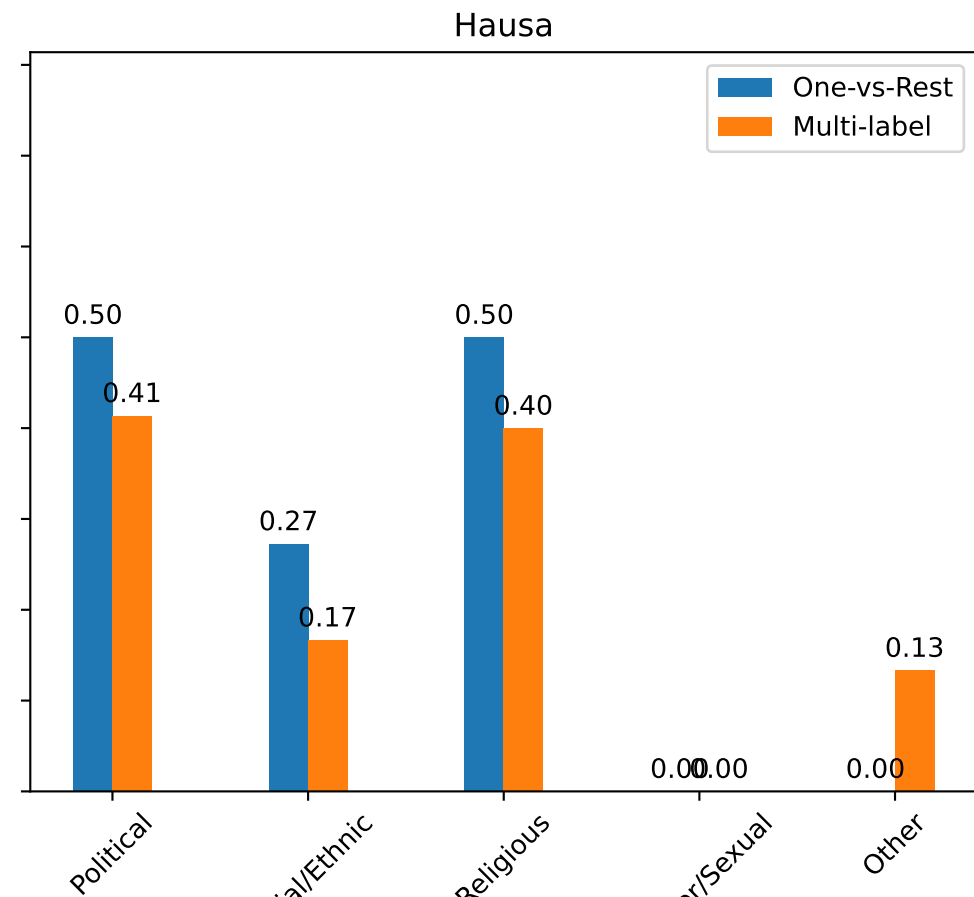

Supplement: SupplementaryMaterial [file Subtask 2_ Type of Polarization - Comparison of Approaches.pdf › Subtask 2_ Type of Polarization - Comparison of Approaches.pdf]

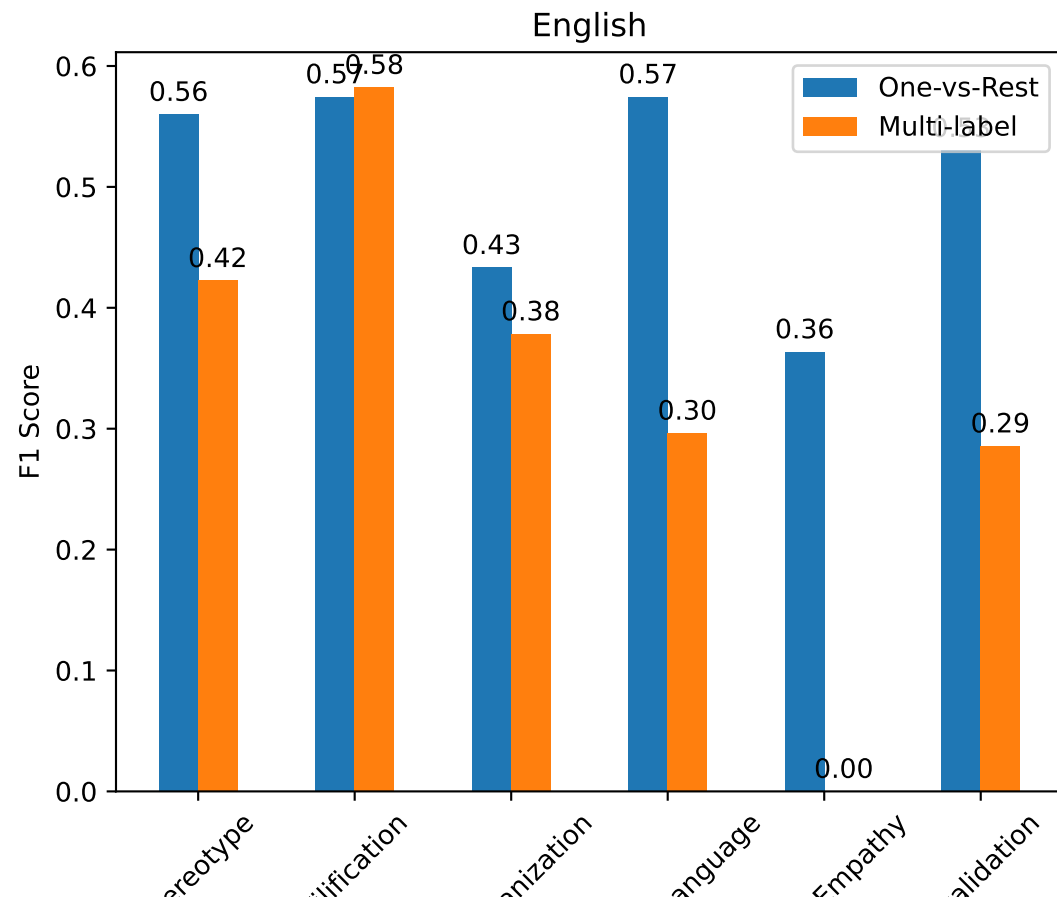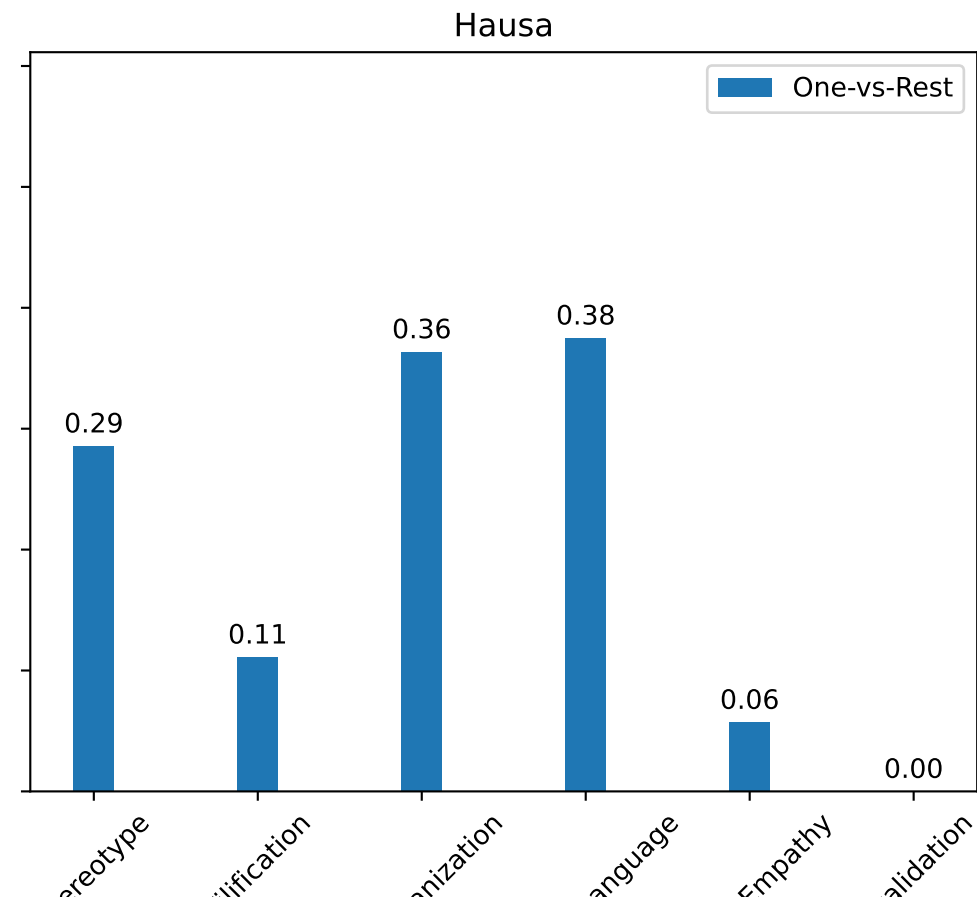

Supplement: SupplementaryMaterial [file Subtask 3_ Manifestation Identification - Comparison of Approaches.pdf › Subtask 3_ Manifestation Identification - Comparison of Approaches.pdf]

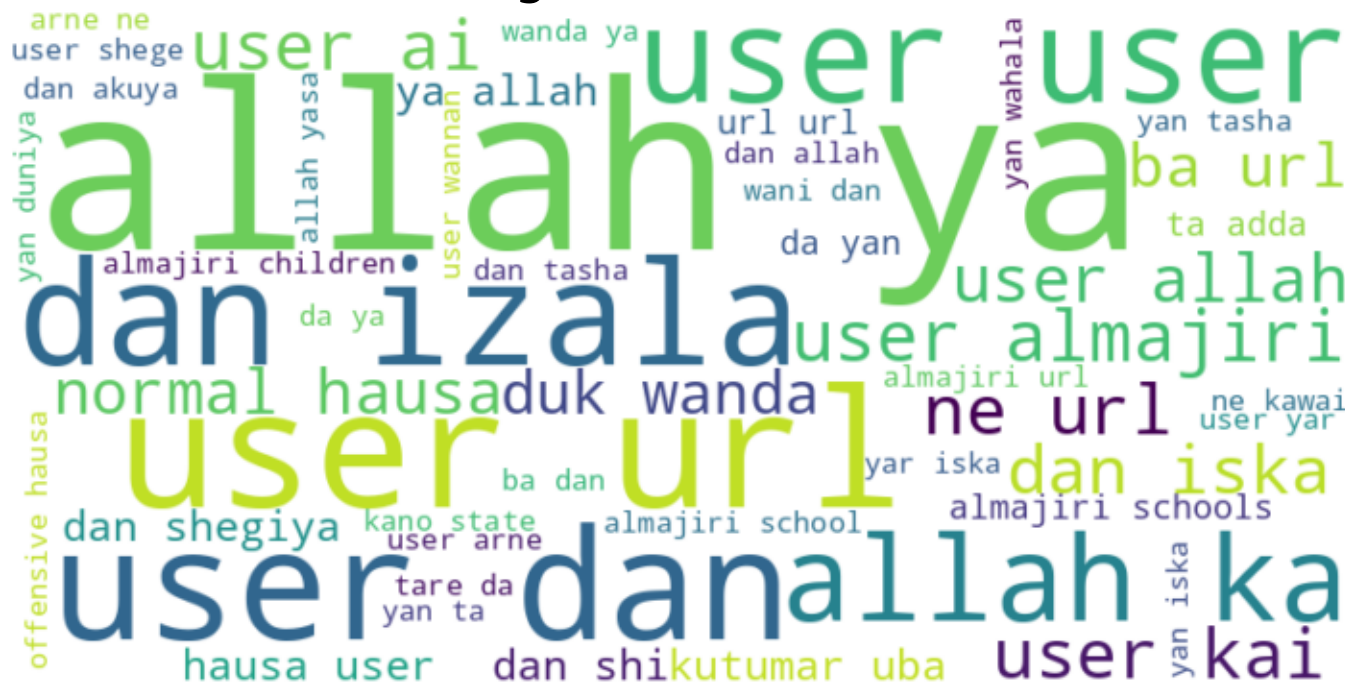[illegible]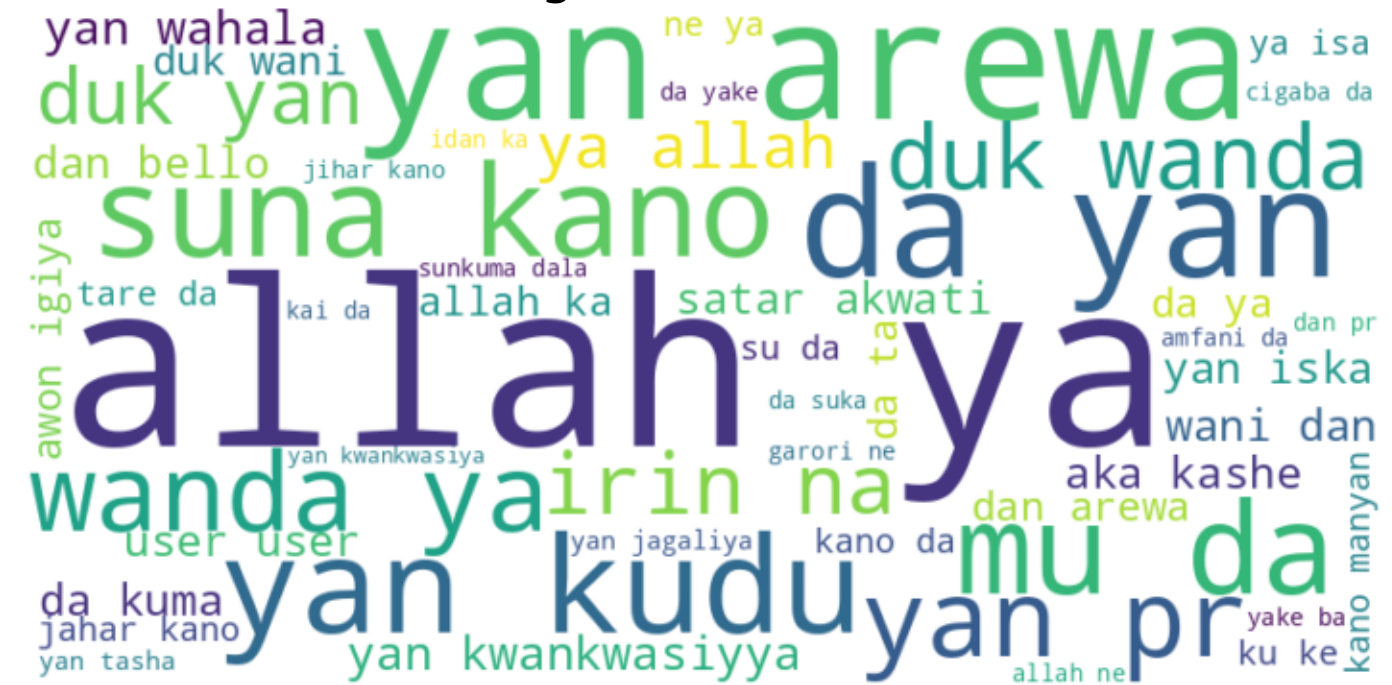

Supplement: SupplementaryMaterial [file lexical_polarization_signalisation_substack1_haussa.pdf › lexical_polarization_signalisation_substack1_haussa.pdf]

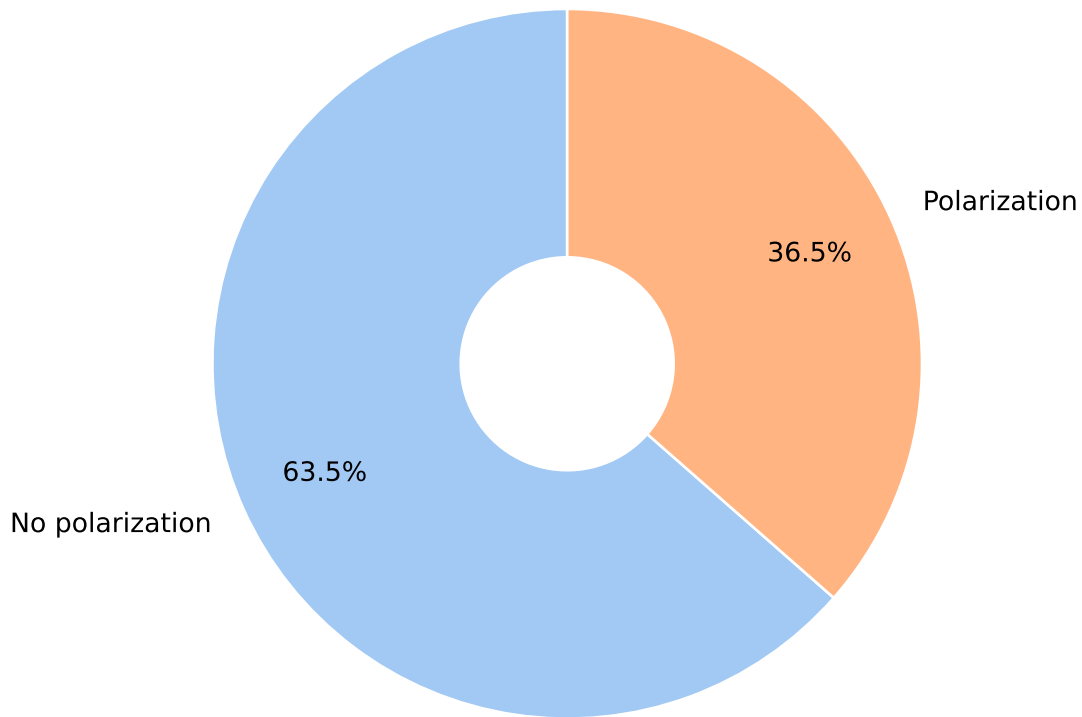

Supplement: SupplementaryMaterial [file subtask1_distribution_english.pdf › subtask1_distribution_english.pdf]

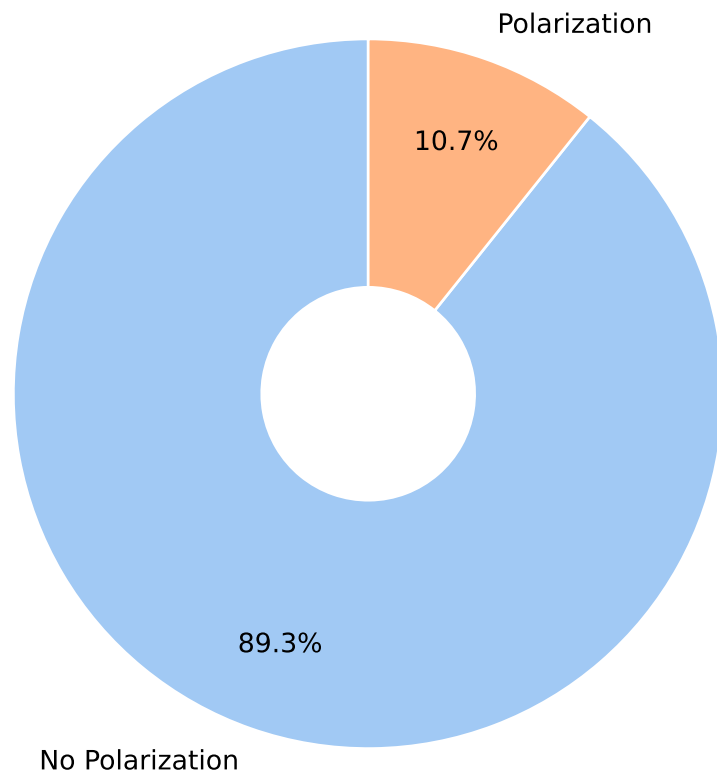

Supplement: SupplementaryMaterial [file subtask1_distribution_haussa-1.pdf › subtask1_distribution_haussa-1.pdf]

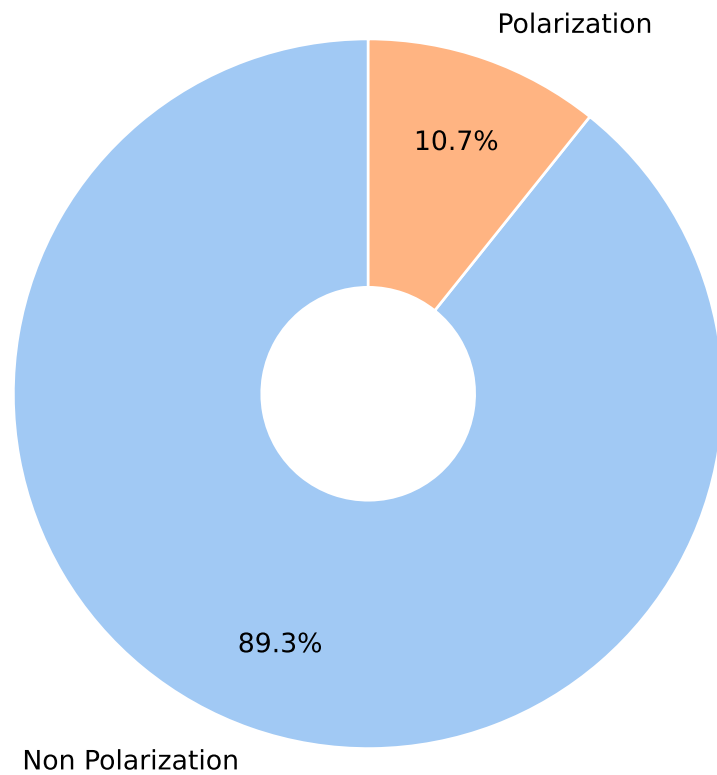

Supplement: SupplementaryMaterial [file subtask1_distribution_haussa.pdf › subtask1_distribution_haussa.pdf]

Word Count Distribution

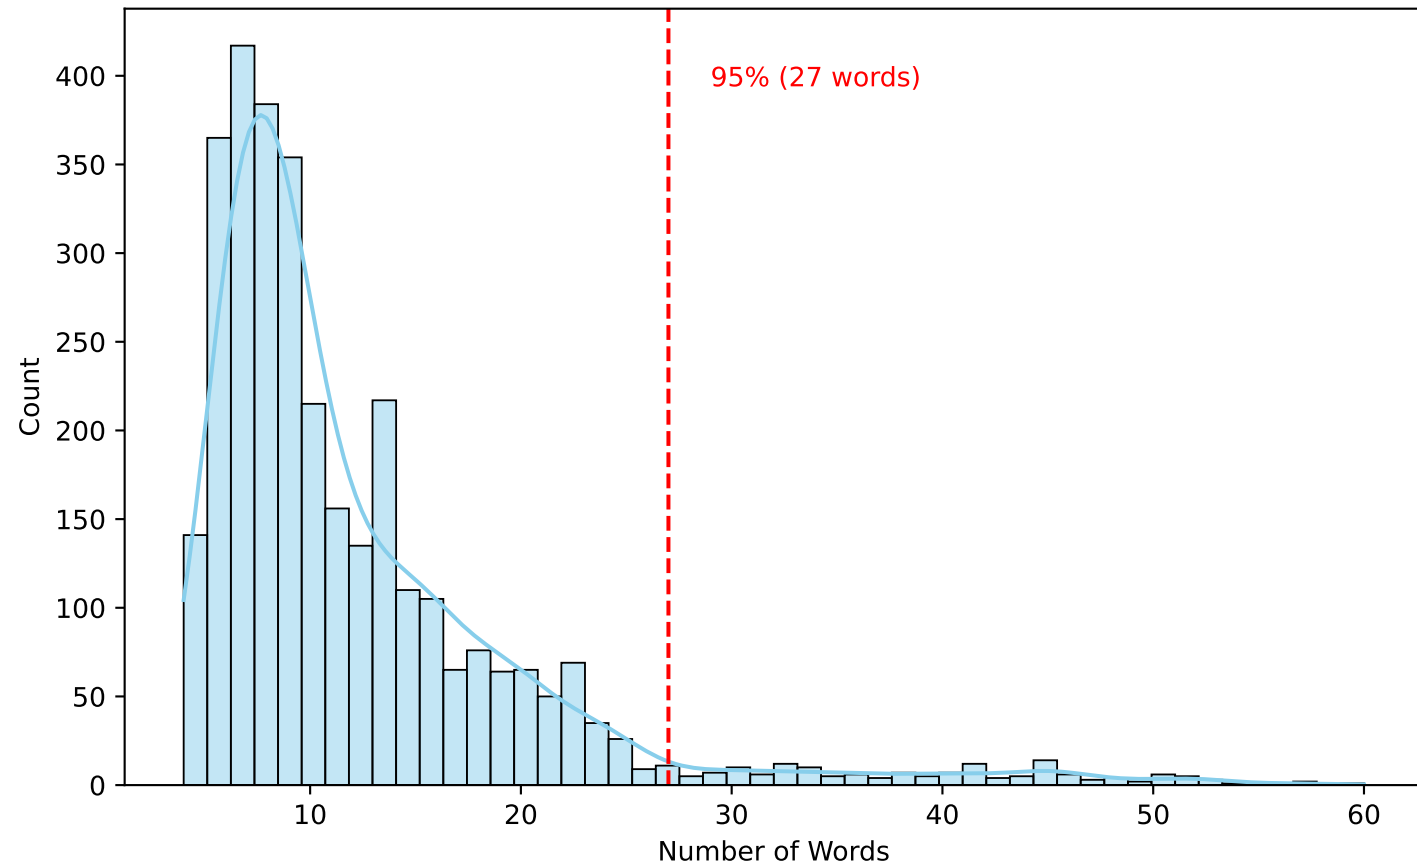

Text Length by Class

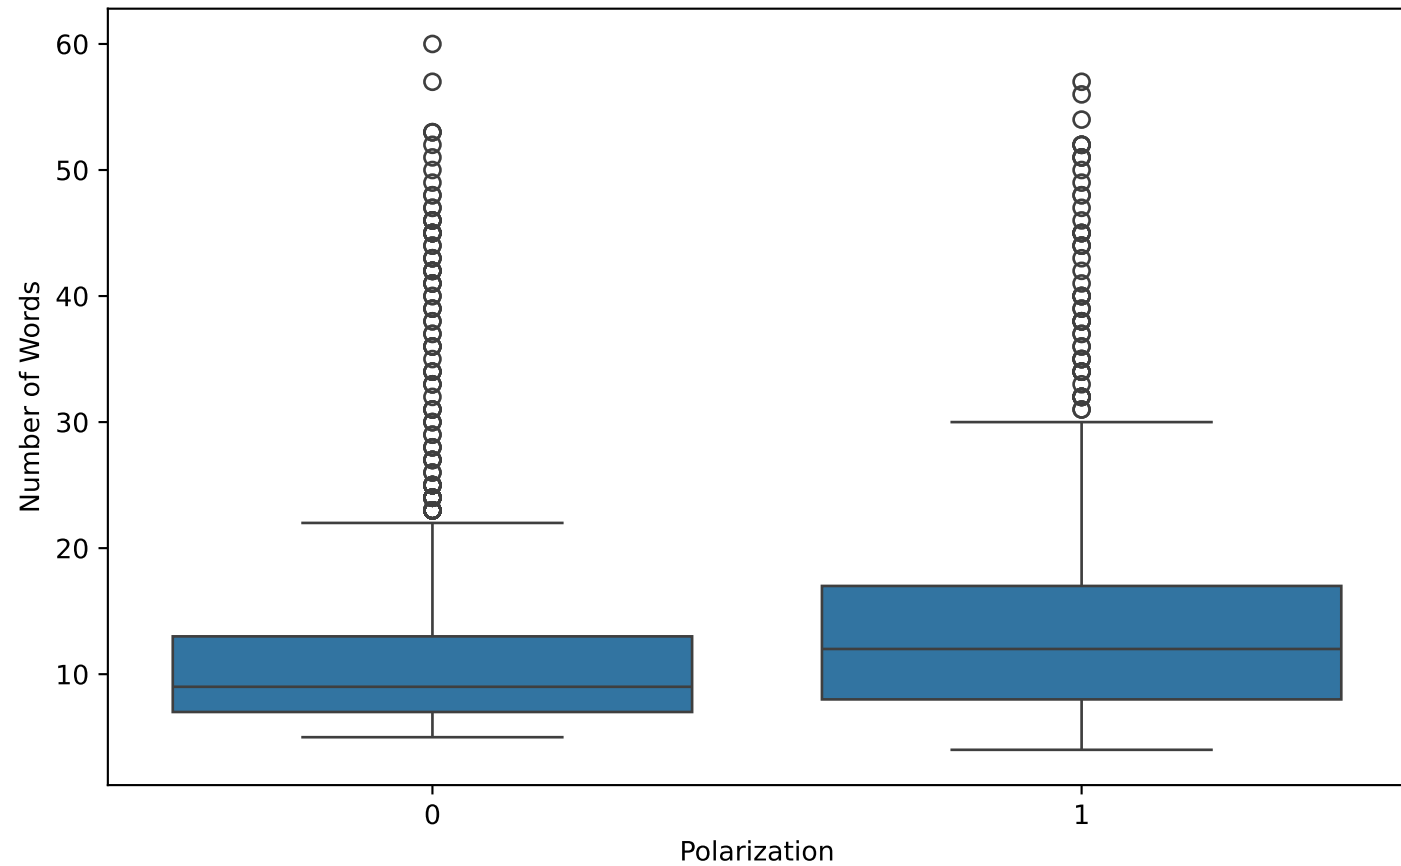

Supplement: SupplementaryMaterial [file subtask1_worldcount_boxplot_distribution_english.pdf › subtask1_worldcount_boxplot_distribution_english.pdf]
